# Supplementary material
Source: PubMed Central journal article supplement (PMC2917113)
Supplement: NIHMS213428-supplement-Supp1.pdf [file NIHMS213428-supplement-Supp1.pdf]

## Supplement Material

### Supplemental Table I:

Plasma total cholesterol and HDL-cholesterol in congenic ApoE<sup>-/-</sup> mice on the B/F (F1) background that were either B/B, B/F or F/F from 0-21.9 cM

|                      | Age.   | Chr 10 interval genotype (males) |           |           | Chr 10 interval genotype (females) |           |           |
|----------------------|--------|----------------------------------|-----------|-----------|------------------------------------|-----------|-----------|
|                      |        | B/B                              | B/F       | F/F       | B/B                                | B/F       | F/F       |
| Cholesterol (mmol/L) | 6 wks  | 18.0±3.9                         | 16.6±6.2  | 17.5±6.6  | 20.2±7.3                           | 18.6±7.9  | 19.3±5.9  |
|                      | 12 wks | 23.5±4.4                         | 21.9±6.9  | 20.2±5.7  | 15.8±4.3                           | 16.3±4.4  | 16.3±4.4  |
|                      | 16 wks | 24.0±5.7                         | 23.6±5.6  | 21.5±8.3  | 16.0±4.7                           | 14.7±3.0  | 16.6±3.5  |
|                      | 20 wks | 22.4±8.7                         | 20.1±6.3  | 18.5±4.5  | 20.9±8.0                           | 17.9±3.7  | 20.6±4.9  |
|                      | 24 wks | 26.0±6.1*                        | 28.5±7.5  | 31.9±5.0  | 18.0±3.0                           | 19.2±3.4  | 18.8±3.6  |
| HDL-chol. (mmol/L)   | 6 wks  | 0.68±0.25                        | 0.81±0.20 | 0.81±0.14 | 0.39±0.15                          | 0.45±0.20 | 0.49±0.21 |
|                      | 12 wks | 0.53±0.3                         | 0.52±0.31 | 0.61±0.33 | 0.24±0.11                          | 0.35±0.24 | 0.40±0.31 |
|                      | 16 wks | 0.73±0.45                        | 0.61±0.27 | 0.65±0.37 | 0.49±0.29                          | 0.46±0.28 | 0.37±0.29 |
|                      | 20 wks | 0.58±0.2                         | 0.56±0.26 | 0.53±0.16 | 0.30±0.06                          | 0.55±0.2  | 0.46±0.26 |
|                      | 24 wks | 0.52±0.21                        | 0.65±0.25 | 0.63±0.28 | 0.41±0.1                           | 0.49±0.25 | 0.54±0.22 |

\* p<0.05 vs F/F

chol.: cholesterol

### Supplemental Table IIa:

Micro-array results – genes regulated in aorta between mice that are either BB or FF at 0-21.9 cM on Chr.10 are shown on the left, genes regulated in aorta between mice that are either BF or FF at 0-21.9 cM on Chr.10 are shown in the middle. On the right genes are shown that were found to be regulated between BB and FF as well as between BF and FF mice

| BB-FF              |                      |     | BF vs FF           |                |     | present on both    |                |     |
|--------------------|----------------------|-----|--------------------|----------------|-----|--------------------|----------------|-----|
| Ensembl ID         | MGI symbol           |     | Ensembl ID         | MGI symbol     |     | Ensembl ID         | MGI symbol     |     |
|                    |                      | 382 |                    |                | 287 |                    |                | 104 |
|                    |                      | 354 |                    |                | 253 |                    |                | 97  |
| ENSMUSG00000000889 | <i>Dbh</i>           |     | ENSMUSG00000000889 | <i>Dbh</i>     |     | ENSMUSG00000000889 | <i>Dbh</i>     |     |
| ENSMUSG00000000902 | <i>Smarcb1</i>       |     | ENSMUSG00000001016 | <i>Ilf2</i>    |     | ENSMUSG00000001016 | <i>Ilf2</i>    |     |
| ENSMUSG00000001016 | <i>Ilf2</i>          |     | ENSMUSG00000001027 | <i>Scn4a</i>   |     | ENSMUSG00000001833 | <i>Sept7</i>   |     |
| ENSMUSG00000001300 | <i>Efnb2</i>         |     | ENSMUSG00000001833 | <i>Sept7</i>   |     | ENSMUSG00000001864 | <i>Aif1l</i>   |     |
| ENSMUSG00000001494 | <i>Sost</i>          |     | ENSMUSG00000001864 | <i>Aif1l</i>   |     | ENSMUSG00000002109 | <i>Ddb2</i>    |     |
| ENSMUSG00000001786 | <i>Fbxo7</i>         |     | ENSMUSG00000002109 | <i>Ddb2</i>    |     | ENSMUSG00000004542 | <i>Psg19</i>   |     |
| ENSMUSG00000001833 | <i>Sept7</i>         |     | ENSMUSG00000002455 | <i>Prpf6</i>   |     | ENSMUSG00000005687 | <i>Bcas2</i>   |     |
| ENSMUSG00000001864 | <i>2810003C17Rik</i> |     | ENSMUSG00000002845 | <i>Tmem39a</i> |     | ENSMUSG00000010406 | <i>Mrpl52</i>  |     |
| ENSMUSG00000002109 | <i>Ddb2</i>          |     | ENSMUSG00000002900 | <i>Lamb1-1</i> |     | ENSMUSG00000016409 | <i>Rhox3b</i>  |     |
| ENSMUSG00000003279 | <i>Dlgap1</i>        |     | ENSMUSG00000002944 | <i>Cd36</i>    |     | ENSMUSG00000016409 | <i>Nkap</i>    |     |
| ENSMUSG00000003752 | <i>Itpkc</i>         |     | ENSMUSG00000003119 | <i>Crkr5</i>   |     | ENSMUSG00000016984 | <i>Etaa1</i>   |     |
| ENSMUSG00000003992 | <i>Ssbp2</i>         |     | ENSMUSG00000003531 | <i>Dgcr6</i>   |     | ENSMUSG00000018500 | <i>Adora2b</i> |     |
| ENSMUSG00000004151 | <i>Etv1</i>          |     | ENSMUSG00000004319 | <i>Clcn3</i>   |     | ENSMUSG00000019143 | <i>Hars2</i>   |     |
| ENSMUSG00000004296 | <i>Il12b</i>         |     | ENSMUSG00000004394 | <i>Tmed4</i>   |     | ENSMUSG00000020182 | <i>Ddc</i>     |     |
| ENSMUSG00000004542 | <i>Psg19</i>         |     | ENSMUSG00000004542 | <i>Psg19</i>   |     | ENSMUSG00000020698 | <i>Cct6b</i>   |     |
| ENSMUSG00000005413 | <i>Hmox1</i>         |     | ENSMUSG00000005682 | <i>Pan2</i>    |     | ENSMUSG00000021418 | <i>Rpp40</i>   |     |
| ENSMUSG00000005687 | <i>Bcas2</i>         |     | ENSMUSG00000005687 | <i>Bcas2</i>   |     | ENSMUSG00000021431 | <i>Snrnp48</i> |     |
| ENSMUSG00000005986 | <i>Ankrd13d</i>      |     | ENSMUSG00000007946 | <i>Phox2a</i>  |     | ENSMUSG00000022711 | <i>Pmm2</i>    |     |
| ENSMUSG00000006390 | <i>Elovl1</i>        |     | ENSMUSG00000007989 | <i>Fzd3</i>    |     | ENSMUSG00000022779 | <i>Top3b</i>   |     |
| ENSMUSG00000006494 | <i>Pdk1</i>          |     | ENSMUSG00000010406 | <i>Mrpl52</i>  |     | ENSMUSG00000022878 | <i>Adipoq</i>  |     |

ENSMUSG00000006586 *Runx1t1*  
ENSMUSG00000006732 *Mettl1*  
ENSMUSG00000007216 *Zfp775*  
ENSMUSG00000008892 *Vdac3*  
ENSMUSG00000010406 *Mrpl52*  
ENSMUSG00000010461 *Eya4*  
ENSMUSG00000010721 *Lmbr1*  
ENSMUSG00000014867 *Surf4*  
ENSMUSG00000015882 *Lcorl*  
ENSMUSG00000016349 *Eef1a2*  
ENSMUSG00000016409 *Rhox3b*  
ENSMUSG00000016409 *Nkap*  
ENSMUSG00000016946 *Kctd5*  
ENSMUSG00000016984 *Etaa1*  
ENSMUSG00000018199 *Trove2*  
ENSMUSG00000018415 *4933439F18Rik*  
ENSMUSG00000018427 *Ypel2*  
ENSMUSG00000018476 *Jmjd3*  
ENSMUSG00000018500 *Adora2b*  
ENSMUSG00000018995 *Nars2*  
ENSMUSG00000019143 *Hars2*  
ENSMUSG00000019577 *Pdk4*  
ENSMUSG00000019802 *Sec63*  
ENSMUSG00000019966 *Kitl*  
ENSMUSG00000019977 *Hbs1l*  
ENSMUSG00000019988 *Nedd1*  
ENSMUSG00000020181 *Nav3*  
ENSMUSG00000020182 *Ddc*  
ENSMUSG00000020305 *Asb3*  
ENSMUSG00000020331 *Hcn2*  
ENSMUSG00000020458 *Rtn4*

ENSMUSG00000013846 *St3gal1*  
ENSMUSG00000015120 *Ube2i*  
ENSMUSG00000015468 *Notch4*  
ENSMUSG00000015656 *Hspa8*  
ENSMUSG00000016409 *Rhox3b*  
ENSMUSG00000016409 *Nkap*  
ENSMUSG00000016984 *Etaa1*  
ENSMUSG00000018347 *Zkscan6*  
ENSMUSG00000018500 *Adora2b*  
ENSMUSG00000018661 *Cog1*  
ENSMUSG00000018986 *Slfn3*  
ENSMUSG00000019139 *Isyna1*  
ENSMUSG00000019143 *Hars2*  
ENSMUSG00000019230 *Lhx9*  
ENSMUSG00000019775 *Rgs17*  
ENSMUSG00000020059 *Sycp3*  
ENSMUSG00000020155 *Kcnmb1*  
ENSMUSG00000020166 *Cnot2*  
ENSMUSG00000020182 *Ddc*  
ENSMUSG00000020409 *Slu7*  
ENSMUSG00000020698 *Cct6b*  
ENSMUSG00000020708 *Psmc5*  
ENSMUSG00000020803 *Txndc17*  
ENSMUSG00000020925 *Ccdc43*  
ENSMUSG00000021281 *Tnfaip2*  
ENSMUSG00000021418 *Rpp40*  
ENSMUSG00000021431 *Snrnp48*  
ENSMUSG00000021567 *Nkd2*  
ENSMUSG00000021792 *5730469M10Rik*  
ENSMUSG00000022159 *Rab2b*  
ENSMUSG00000022314 *Rad21*

ENSMUSG00000022952 *Runx1*  
ENSMUSG00000024774 *Ankrd22*  
ENSMUSG00000025429 *Pstpip2*  
ENSMUSG00000025479 *Cyp2e1*  
ENSMUSG00000025488 *Cox8b*  
ENSMUSG00000025855 *Prkar1b*  
ENSMUSG00000025950 *Idh1*  
ENSMUSG00000026385 *Dbi*  
ENSMUSG00000026389 *Steap3*  
ENSMUSG00000026670 *Uap1*  
ENSMUSG00000026740 *Dnajc1*  
ENSMUSG00000027273 *Snap25*  
ENSMUSG00000027350 *Chgb*  
ENSMUSG00000027513 *Pck1*  
ENSMUSG00000027559 *Car3*  
ENSMUSG00000027677 *Ttc14*  
ENSMUSG00000027984 *Hadh*  
ENSMUSG00000028132 *Tmem56*  
ENSMUSG00000028245 *Nsmaf*  
ENSMUSG00000029228 *Ln timer*  
ENSMUSG00000029291 *Rufy3*  
ENSMUSG00000029486 *Mrpl1*  
ENSMUSG00000029669 *Tspan12*  
ENSMUSG00000029819 *Npy*  
ENSMUSG00000030278 *Cidec*  
ENSMUSG00000031229 *Atrx*  
ENSMUSG00000031392 *Irak1*  
ENSMUSG00000031551 *Indo*  
ENSMUSG00000031592 *Pcm1*  
ENSMUSG00000031667 *Aktip*  
ENSMUSG00000031710 *Ucp1*

ENSMUSG00000020698 *Cct6b*  
ENSMUSG00000020739 *Nup85*  
ENSMUSG00000020877 *Scrn2*  
ENSMUSG00000020886 *Dlg4*  
ENSMUSG00000021027 *Garnl1*  
ENSMUSG00000021038 *Al413782*  
ENSMUSG00000021115 *Vrk1*  
ENSMUSG00000021276 *2810452K22Rik*  
ENSMUSG00000021374 *Nup153*  
ENSMUSG00000021418 *Rpp40*  
ENSMUSG00000021431 *Snrnp48*  
ENSMUSG00000021509 *AU042651*  
ENSMUSG00000021510 *A530054K11Rik*  
ENSMUSG00000021712 *Trim23*  
ENSMUSG00000021745 *Ptprg*  
ENSMUSG00000022018 *1190002H23Rik*  
ENSMUSG00000022023 *Wbp4*  
ENSMUSG00000022052 *Ppp2r2a*  
ENSMUSG00000022119 *Rbm26*  
ENSMUSG00000022131 *Gpr180*  
ENSMUSG00000022244 *Amacr*  
ENSMUSG00000022253 *1110020G09Rik*  
ENSMUSG00000022676 *Snai2*  
ENSMUSG00000022705 *Drd3*  
ENSMUSG00000022711 *Pmm2*  
ENSMUSG00000022779 *Top3b*  
ENSMUSG00000022800 *Fyttl1*  
ENSMUSG00000022878 *Adipoq*  
ENSMUSG00000022948 *Setd4*  
ENSMUSG00000022952 *Runx1*  
ENSMUSG00000023277 *Twf2*

ENSMUSG00000022329 *Stk3*  
ENSMUSG00000022336 *Eif3e*  
ENSMUSG00000022711 *Pmm2*  
ENSMUSG00000022779 *Top3b*  
ENSMUSG00000022878 *Adipoq*  
ENSMUSG00000022952 *Runx1*  
ENSMUSG00000022978 *2610039C10Rik*  
ENSMUSG00000023019 *Gpd1*  
ENSMUSG00000024247 *AW548124*  
ENSMUSG00000024526 *Cidea*  
ENSMUSG00000024640 *Psat1*  
ENSMUSG00000024774 *Ankrd22*  
ENSMUSG00000024778 *Fas*  
ENSMUSG00000024781 *Lipa*  
ENSMUSG00000024896 *Minpp1*  
ENSMUSG00000025134 *Thoc4*  
ENSMUSG00000025162 *Csnk1d*  
ENSMUSG00000025289 *Prdx4*  
ENSMUSG00000025429 *Pstpip2*  
ENSMUSG00000025479 *Cyp2e1*  
ENSMUSG00000025488 *Cox8b*  
ENSMUSG00000025558 *Dock9*  
ENSMUSG00000025758 *Plk4*  
ENSMUSG00000025855 *Prkar1b*  
ENSMUSG00000025860 *Xiap*  
ENSMUSG00000025950 *Idh1*  
ENSMUSG00000026355 *Mcm6*  
ENSMUSG00000026385 *Dbi*  
ENSMUSG00000026389 *Steap3*  
ENSMUSG00000026622 *Nek2*  
ENSMUSG00000026670 *Uap1*

ENSMUSG00000031722 *Hp*  
ENSMUSG00000031845 *Bcma1*  
ENSMUSG00000032392 *Parp16*  
ENSMUSG00000032621 *Sfrs12*  
ENSMUSG00000033491 *Prss35*  
ENSMUSG00000034640 *Tiparp*  
ENSMUSG00000035232 *Pdk3*  
ENSMUSG00000037542 *Aldh8a1*  
ENSMUSG00000037705 *Tecta*  
ENSMUSG00000038641 *Akr1d1*  
ENSMUSG00000039095 *En2*  
ENSMUSG00000039194 *Rlbp1*  
ENSMUSG00000039428 *Tmem135*  
ENSMUSG00000040430 *Pitpnc1*  
ENSMUSG00000040963 *Asgr2*  
ENSMUSG00000041361 *Gcom1*  
ENSMUSG00000041607 *Mbp*  
ENSMUSG00000042472 *Zfp410*  
ENSMUSG00000043089 *Mmp1a*  
ENSMUSG00000044743 *Defb10*  
ENSMUSG00000045817 *Zfp36l2*  
ENSMUSG00000046186 *Cd109*  
ENSMUSG00000046679 *C87436*  
ENSMUSG00000050677 *Ccdc96*  
ENSMUSG00000051451 *Crebzf*  
ENSMUSG00000052962 *Mrpl35*  
ENSMUSG00000053475 *Tnfaip6*  
ENSMUSG00000055692 *Tmem191c*  
ENSMUSG00000056537 *Rnf12*  
ENSMUSG00000058258 *Idi1*  
ENSMUSG00000058748 *BC003267*

ENSMUSG00000023391 *Dlx2*  
ENSMUSG00000023868 *Pde10a*  
ENSMUSG00000024154 *Gtf2a1l*  
ENSMUSG00000024158 *Hagh*  
ENSMUSG00000024210 *Ihpk3*  
ENSMUSG00000024317 *Rnf138*  
ENSMUSG00000024379 *Tslp*  
ENSMUSG00000024603 *Dctn4*  
ENSMUSG00000024766 *AI747699*  
ENSMUSG00000024774 *Ankrd22*  
ENSMUSG00000024798 *Htr7*  
ENSMUSG00000024883 *Rin1*  
ENSMUSG00000024913 *Lrp5*  
ENSMUSG00000024985 *Tcf7l2*  
ENSMUSG00000025429 *Pstpip2*  
ENSMUSG00000025431 *Crisp1*  
ENSMUSG00000025475 *Gpr123*  
ENSMUSG00000025479 *Cyp2e1*  
ENSMUSG00000025488 *Cox8b*  
ENSMUSG00000025855 *Prkar1b*  
ENSMUSG00000025920 *Stau2*  
ENSMUSG00000025950 *Idh1*  
ENSMUSG00000026096 *Osgpl1*  
ENSMUSG00000026113 *Inpp4a*  
ENSMUSG00000026163 *Sphkap*  
ENSMUSG00000026385 *Dbi*  
ENSMUSG00000026389 *Steap3*  
ENSMUSG00000026473 *Glul*  
ENSMUSG00000026566 *Mpzl1*  
ENSMUSG00000026610 *Esrrg*  
ENSMUSG00000026670 *Uap1*

ENSMUSG00000026740 *Dnajc1*  
ENSMUSG00000026960 *Arl6ip6*  
ENSMUSG00000027273 *Snap25*  
ENSMUSG00000027286 *Lrrc57*  
ENSMUSG00000027350 *Chgb*  
ENSMUSG00000027395 *Polr1b*  
ENSMUSG00000027423 *Snx5*  
ENSMUSG00000027513 *Pck1*  
ENSMUSG00000027536 *Chmp4c*  
ENSMUSG00000027559 *Car3*  
ENSMUSG00000027589 *Pcmt2*  
ENSMUSG00000027677 *Ttc14*  
ENSMUSG00000027984 *Hadh*  
ENSMUSG00000028132 *Tmem56*  
ENSMUSG00000028158 *Mttp*  
ENSMUSG00000028207 *Asph*  
ENSMUSG00000028212 *Ccne2*  
ENSMUSG00000028245 *Nsmaf*  
ENSMUSG00000028382 *Rod1*  
ENSMUSG00000028427 *Aqp7*  
ENSMUSG00000028478 *Ctla*  
ENSMUSG00000028790 *Khdrbs1*  
ENSMUSG00000028890 *Mtf1*  
ENSMUSG00000028975 *Pex14*  
ENSMUSG00000028978 *Nos3*  
ENSMUSG00000029027 *Dffb*  
ENSMUSG00000029036 *Atad3a*  
ENSMUSG00000029228 *Lnx1*  
ENSMUSG00000029238 *Clock*  
ENSMUSG00000029290 *Zfp326*  
ENSMUSG00000029291 *Rufy3*

ENSMUSG00000061780 *Cfd*  
ENSMUSG00000063605 *Ccdc102a*  
ENSMUSG00000063779 *Chi3l4*  
ENSMUSG00000071217 *BB287469*  
ENSMUSG00000071356 *Reg3b*  
ENSMUSG00000072905  
ENSMUSG00000073830  
ENSMUSG00000073832  
ENSMUSG00000073839 *OTTMUSG00000012493*  
ENSMUSG00000073842 *OTTMUSG00000007428*  
ENSMUSG00000078673  
ENSMUSG00000078680 *2610016E04Rik*  
ENSMUSG00000078683 *Mup1*  
ENSMUSG00000078686 *Mup2*  
ENSMUSG00000078687 *OTTMUSG00000008509*  
ENSMUSG00000078688  
ENSMUSG00000078979  
ENSMUSG00000079029 *EG266459*  
ENSMUSG00000079030  
ENSMUSG00000079031 *BB287469*  
ENSMUSG00000079032  
ENSMUSG00000079298 *Klrb1b*  
ENSMUSG00000079658 *Tceb1*

ENSMUSG00000026740 *Dnajc1*  
ENSMUSG00000026787 *Gad2*  
ENSMUSG00000026826 *Nr4a2*  
ENSMUSG00000026833 *Olfm1*  
ENSMUSG00000026834 *Acvr1c*  
ENSMUSG00000027088 *Phospho2*  
ENSMUSG00000027244 *D2Ert391e*  
ENSMUSG00000027255 *Arfgap2*  
ENSMUSG00000027273 *Snap25*  
ENSMUSG00000027274 *Mkks*  
ENSMUSG00000027350 *Chgb*  
ENSMUSG00000027427 *Polr3f*  
ENSMUSG00000027490 *E2f1*  
ENSMUSG00000027513 *Pck1*  
ENSMUSG00000027559 *Car3*  
ENSMUSG00000027581 *Stmn3*  
ENSMUSG00000027665 *Pik3ca*  
ENSMUSG00000027677 *Ttc14*  
ENSMUSG00000027679 *Dnajc19*  
ENSMUSG00000027855 *Sycp1*  
ENSMUSG00000027933 *Ints3*  
ENSMUSG00000027958 *Hiat1*  
ENSMUSG00000027977 *Ndst3*  
ENSMUSG00000027984 *Hadh*  
ENSMUSG00000028107 *Tars2*  
ENSMUSG00000028132 *Tmem56*  
ENSMUSG00000028182 *Lrriq3*  
ENSMUSG00000028226 *Mmp16*  
ENSMUSG00000028240 *Cyp7a1*  
ENSMUSG00000028245 *Nsmaf*  
ENSMUSG00000028496 *Mllt3*

ENSMUSG00000029334 *Prkg2*  
ENSMUSG00000029366 *Dck*  
ENSMUSG00000029486 *Mrpl1*  
ENSMUSG00000029669 *Tspan12*  
ENSMUSG00000029819 *Npy*  
ENSMUSG00000030029 *Lrig1*  
ENSMUSG00000030057 *Cnbp*  
ENSMUSG00000030067 *Foxp1*  
ENSMUSG00000030278 *Cidec*  
ENSMUSG00000030302 *Atp2b2*  
ENSMUSG00000030505 *Prmt3*  
ENSMUSG00000030609 *Aen*  
ENSMUSG00000030660 *Pik3c2a*  
ENSMUSG00000030787 *Lyve1*  
ENSMUSG00000030990 *Frag1*  
ENSMUSG00000031068 *Glrx3*  
ENSMUSG00000031125 *3830403N18Rik*  
ENSMUSG00000031229 *Atrx*  
ENSMUSG00000031309 *Rps6ka3*  
ENSMUSG00000031355 *Arhgap6*  
ENSMUSG00000031392 *Irak1*  
ENSMUSG00000031551 *Indo*  
ENSMUSG00000031592 *Pcm1*  
ENSMUSG00000031667 *Aktip*  
ENSMUSG00000031710 *Ucp1*  
ENSMUSG00000031714 *Gab1*  
ENSMUSG00000031722 *Hp*  
ENSMUSG00000031845 *Bcmo1*  
ENSMUSG00000031875 *Cmtm3*  
ENSMUSG00000031985 *Gnpat*  
ENSMUSG00000032034 *Kcnj5*

|                    |                      |                    |                      |
|--------------------|----------------------|--------------------|----------------------|
| ENSMUSG00000028636 | <i>Ppcs</i>          | ENSMUSG00000032050 | <i>Rdx</i>           |
| ENSMUSG00000028820 | <i>Sfpq</i>          | ENSMUSG00000032253 | <i>Phip</i>          |
| ENSMUSG00000028838 | <i>Extl1</i>         | ENSMUSG00000032369 | <i>Plscr1</i>        |
| ENSMUSG00000028970 | <i>Abcb1b</i>        | ENSMUSG00000032392 | <i>Parp16</i>        |
| ENSMUSG00000029228 | <i>Lnx1</i>          | ENSMUSG00000032440 | <i>Tgfbr2</i>        |
| ENSMUSG00000029291 | <i>Rufy3</i>         | ENSMUSG00000032470 | <i>Mras</i>          |
| ENSMUSG00000029486 | <i>Mrpl1</i>         | ENSMUSG00000032621 | <i>Sfrs12</i>        |
| ENSMUSG00000029669 | <i>Tspan12</i>       | ENSMUSG00000032667 | <i>Pon2</i>          |
| ENSMUSG00000029697 | <i>Fezf1</i>         | ENSMUSG00000032997 | <i>Chpf</i>          |
| ENSMUSG00000029752 | <i>Asns</i>          | ENSMUSG00000032998 | <i>Foxj3</i>         |
| ENSMUSG00000029819 | <i>Npy</i>           | ENSMUSG00000033491 | <i>Prss35</i>        |
| ENSMUSG00000029920 | <i>Smarcad1</i>      | ENSMUSG00000033781 | <i>Asb13</i>         |
| ENSMUSG00000030259 | <i>Rassf8</i>        | ENSMUSG00000033845 | <i>Mrpl15</i>        |
| ENSMUSG00000030278 | <i>Cidec</i>         | ENSMUSG00000033981 | <i>Gria2</i>         |
| ENSMUSG00000030319 | <i>Cand2</i>         | ENSMUSG00000034640 | <i>Tiparp</i>        |
| ENSMUSG00000030423 | <i>Pop4</i>          | ENSMUSG00000034826 | <i>Nup54</i>         |
| ENSMUSG00000030469 | <i>Zfp719</i>        | ENSMUSG00000035232 | <i>Pdk3</i>          |
| ENSMUSG00000030603 | <i>Psmc4</i>         | ENSMUSG00000036144 | <i>Meox2</i>         |
| ENSMUSG00000030924 | <i>2610020H08Rik</i> | ENSMUSG00000036782 | <i>Klhl13</i>        |
| ENSMUSG00000030956 | <i>A930008G19Rik</i> | ENSMUSG00000037347 | <i>Chst7</i>         |
| ENSMUSG00000031010 | <i>Usp9x</i>         | ENSMUSG00000037542 | <i>Aldh8a1</i>       |
| ENSMUSG00000031015 | <i>Swap70</i>        | ENSMUSG00000037705 | <i>Tecta</i>         |
| ENSMUSG00000031145 | <i>Prickle3</i>      | ENSMUSG00000037730 | <i>Mynn</i>          |
| ENSMUSG00000031201 | <i>Brcc3</i>         | ENSMUSG00000037808 | <i>2810485I05Rik</i> |
| ENSMUSG00000031229 | <i>Atrx</i>          | ENSMUSG00000038641 | <i>Akr1d1</i>        |
| ENSMUSG00000031271 | <i>Serpina7</i>      | ENSMUSG00000038708 | <i>Golga4</i>        |
| ENSMUSG00000031330 | <i>Zcchc13</i>       | ENSMUSG00000038828 | <i>1110039B18Rik</i> |
| ENSMUSG00000031367 | <i>Ap1s2</i>         | ENSMUSG00000039001 | <i>Rps21</i>         |
| ENSMUSG00000031392 | <i>Irak1</i>         | ENSMUSG00000039095 | <i>En2</i>           |
| ENSMUSG00000031403 | <i>Dkc1</i>          | ENSMUSG00000039153 | <i>Runx2</i>         |
| ENSMUSG00000031517 | <i>Gpm6a</i>         | ENSMUSG00000039194 | <i>Rlbp1</i>         |

ENSMUSG00000031551 *Indo*  
ENSMUSG00000031592 *Pcm1*  
ENSMUSG00000031605 *Klhl2*  
ENSMUSG00000031634 *Ufsp2*  
ENSMUSG00000031667 *Aktip*  
ENSMUSG00000031710 *Ucp1*  
ENSMUSG00000031722 *Hp*  
ENSMUSG00000031845 *Bcma1*  
ENSMUSG00000032226 *Gcnt3*  
ENSMUSG00000032392 *Parp16*  
ENSMUSG00000032621 *Sfrs12*  
ENSMUSG00000032712 *2810474O19Rik*  
ENSMUSG00000033016 *Nfatc1*  
ENSMUSG00000033392 *Clasp2*  
ENSMUSG00000033439 *Ccdc76*  
ENSMUSG00000033491 *Prss35*  
ENSMUSG00000033615 *Cplx1*  
ENSMUSG00000033773 *Rpap2*  
ENSMUSG00000033852 *Pla2g4b*  
ENSMUSG00000033960 *9430020K01Rik*  
ENSMUSG00000033965 *Slc16a2*  
ENSMUSG00000034329 *Brip1*  
ENSMUSG00000034460 *Six4*  
ENSMUSG00000034552 *Zswim2*  
ENSMUSG00000034640 *Tiparp*  
ENSMUSG00000034780 *B3galt1*  
ENSMUSG00000035024 *Ncapd3*  
ENSMUSG00000035104 *Fam176a*  
ENSMUSG00000035232 *Pdk3*  
ENSMUSG00000035293 *6030408C04Rik*  
ENSMUSG00000035310 *Lin54*

ENSMUSG00000039428 *Tmem135*  
ENSMUSG00000040018 *Cox15*  
ENSMUSG00000040061 *Plcb2*  
ENSMUSG00000040430 *Pitpnc1*  
ENSMUSG00000040451 *Sgms1*  
ENSMUSG00000040481 *Bptf*  
ENSMUSG00000040859 *Bsdc1*  
ENSMUSG00000040963 *Asgr2*  
ENSMUSG00000041261 *Car8*  
ENSMUSG00000041361 *Gcom1*  
ENSMUSG00000041415 *Dicer1*  
ENSMUSG00000041607 *Mbp*  
ENSMUSG00000042251 *Pm20d1*  
ENSMUSG00000042472 *Zfp410*  
ENSMUSG00000042747 *Krtcap2*  
ENSMUSG00000043089 *Mmp1a*  
ENSMUSG00000043165 *Lor*  
ENSMUSG00000043259 *1200015N20Rik*  
ENSMUSG00000044072 *C230094A16Rik*  
ENSMUSG00000044649  
ENSMUSG00000044743 *Defb10*  
ENSMUSG00000044763 *Rg9mtd1*  
ENSMUSG00000045817 *Zfp3612*  
ENSMUSG00000046186 *Cd109*  
ENSMUSG00000046679 *C87436*  
ENSMUSG00000047250 *Ptgs1*  
ENSMUSG00000047306  
ENSMUSG00000048040  
ENSMUSG00000049494  
ENSMUSG00000050677 *Ccdc96*  
ENSMUSG00000051451 *Crebzf*



|                    |                      |                    |                      |
|--------------------|----------------------|--------------------|----------------------|
| ENSMUSG00000035367 | <i>Rmi1</i>          | ENSMUSG00000052305 |                      |
| ENSMUSG00000035762 | <i>Tmem161b</i>      | ENSMUSG00000052854 | <i>Nrk</i>           |
| ENSMUSG00000035929 |                      | ENSMUSG00000052962 | <i>Mrpl35</i>        |
| ENSMUSG00000036009 | <i>BC067068</i>      | ENSMUSG00000053398 | <i>Phgdh</i>         |
| ENSMUSG00000036112 | <i>Metap2</i>        | ENSMUSG00000053475 | <i>Tnfaip6</i>       |
| ENSMUSG00000036202 | <i>Rif1</i>          | ENSMUSG00000053702 | <i>Nebi</i>          |
| ENSMUSG00000036368 | <i>AW061290</i>      | ENSMUSG00000054626 | <i>Xlr</i>           |
| ENSMUSG00000036822 | <i>Topors</i>        | ENSMUSG00000055301 | <i>Adh7</i>          |
| ENSMUSG00000037336 | <i>Gm1964</i>        | ENSMUSG00000055692 | <i>Tmem191c</i>      |
| ENSMUSG00000037490 | <i>Slc2a12</i>       | ENSMUSG00000056035 | <i>Cyp3a11</i>       |
| ENSMUSG00000037542 | <i>Aldh8a1</i>       | ENSMUSG00000056537 | <i>Rnf12</i>         |
| ENSMUSG00000037594 | <i>BC022687</i>      | ENSMUSG00000057789 | <i>Bak1</i>          |
| ENSMUSG00000037705 | <i>Tecta</i>         | ENSMUSG00000058258 | <i>Idi1</i>          |
| ENSMUSG00000037826 | <i>Ppm1k</i>         | ENSMUSG00000058350 |                      |
| ENSMUSG00000037921 | <i>Ddx60</i>         | ENSMUSG00000058748 | <i>BC003267</i>      |
| ENSMUSG00000038069 | <i>Cdkn2aip</i>      | ENSMUSG00000059456 | <i>Ptk2b</i>         |
| ENSMUSG00000038084 | <i>Opa1</i>          | ENSMUSG00000059814 |                      |
| ENSMUSG00000038156 | <i>Spon1</i>         | ENSMUSG00000060090 | <i>Rp2h</i>          |
| ENSMUSG00000038178 | <i>Slc43a2</i>       | ENSMUSG00000060244 | <i>Refbp2</i>        |
| ENSMUSG00000038641 | <i>Akr1d1</i>        | ENSMUSG00000061079 | <i>Zfp143</i>        |
| ENSMUSG00000038738 | <i>Shank1</i>        | ENSMUSG00000061780 | <i>Cfd</i>           |
| ENSMUSG00000038925 | <i>E330034G19Rik</i> | ENSMUSG00000062019 |                      |
| ENSMUSG00000039095 | <i>En2</i>           | ENSMUSG00000062376 | <i>2010012O05Rik</i> |
| ENSMUSG00000039194 | <i>Rlbp1</i>         | ENSMUSG00000062937 | <i>Mtap</i>          |
| ENSMUSG00000039428 | <i>Tmem135</i>       | ENSMUSG00000063514 | <i>EG627427</i>      |
| ENSMUSG00000039782 | <i>Cpeb2</i>         | ENSMUSG00000063605 | <i>Ccdc102a</i>      |
| ENSMUSG00000039831 | <i>Arhgap29</i>      | ENSMUSG00000063779 | <i>Chi3l4</i>        |
| ENSMUSG00000039942 | <i>Ptger4</i>        | ENSMUSG00000064289 | <i>Tank</i>          |
| ENSMUSG00000040407 | <i>Akap9</i>         | ENSMUSG00000066441 | <i>Rdh11</i>         |
| ENSMUSG00000040430 | <i>Pitpnc1</i>       | ENSMUSG00000067931 | <i>BC049807</i>      |
| ENSMUSG00000040464 | <i>Gtpbp10</i>       | ENSMUSG00000069044 | <i>Usp9y</i>         |

|                    |                      |                    |                           |
|--------------------|----------------------|--------------------|---------------------------|
| ENSMUSG00000040648 | <i>Hisppd1</i>       | ENSMUSG00000070355 | <i>Alg14</i>              |
| ENSMUSG00000040829 | <i>Zmynd15</i>       | ENSMUSG00000071217 | <i>BB287469</i>           |
| ENSMUSG00000040963 | <i>Asgr2</i>         | ENSMUSG00000071356 | <i>Reg3b</i>              |
| ENSMUSG00000041064 | <i>Pif1</i>          | ENSMUSG00000072829 |                           |
| ENSMUSG00000041112 | <i>Elmo1</i>         | ENSMUSG00000072905 |                           |
| ENSMUSG00000041278 | <i>Ttc1</i>          | ENSMUSG00000073001 | <i>Cylc1</i>              |
| ENSMUSG00000041361 | <i>Gcom1</i>         | ENSMUSG00000073830 |                           |
| ENSMUSG00000041607 | <i>Mbp</i>           | ENSMUSG00000073832 |                           |
| ENSMUSG00000042472 | <i>Zfp410</i>        | ENSMUSG00000073839 | <i>OTTMUSG00000012492</i> |
| ENSMUSG00000042734 | <i>Ttc9</i>          | ENSMUSG00000073842 | <i>OTTMUSG00000007428</i> |
| ENSMUSG00000042737 | <i>Dpm3</i>          | ENSMUSG00000073940 | <i>Hbb-b2</i>             |
| ENSMUSG00000042918 | <i>5430432N15Rik</i> | ENSMUSG00000074218 | <i>Cox7a1</i>             |
| ENSMUSG00000043089 | <i>Mmp1a</i>         | ENSMUSG00000074994 | <i>Qser1</i>              |
| ENSMUSG00000043154 | <i>Ppp2r3a</i>       | ENSMUSG00000078656 | <i>Vps25</i>              |
| ENSMUSG00000043270 |                      | ENSMUSG00000078673 |                           |
| ENSMUSG00000043518 | <i>Rai2</i>          | ENSMUSG00000078680 | <i>2610016E04Rik</i>      |
| ENSMUSG00000043858 | <i>Nup62</i>         | ENSMUSG00000078683 | <i>Mup1</i>               |
| ENSMUSG00000044067 | <i>Gpr22</i>         | ENSMUSG00000078686 | <i>Mup2</i>               |
| ENSMUSG00000044461 | <i>Shisa2</i>        | ENSMUSG00000078687 | <i>OTTMUSG00000008509</i> |
| ENSMUSG00000044743 | <i>Defb10</i>        | ENSMUSG00000078688 |                           |
| ENSMUSG00000044768 | <i>D1Ert622e</i>     | ENSMUSG00000078861 | <i>2810021G02Rik</i>      |
| ENSMUSG00000045136 | <i>Tubb2b</i>        | ENSMUSG00000078870 | <i>OTTMUSG00000016578</i> |
| ENSMUSG00000045328 | <i>Cenpe</i>         | ENSMUSG00000078875 |                           |
| ENSMUSG00000045817 | <i>Zfp36l2</i>       | ENSMUSG00000078877 | <i>OTTMUSG00000016219</i> |
| ENSMUSG00000046186 | <i>Cd109</i>         | ENSMUSG00000078878 |                           |
| ENSMUSG00000046361 | <i>2810416G20Rik</i> | ENSMUSG00000078880 |                           |
| ENSMUSG00000046679 | <i>C87436</i>        | ENSMUSG00000078881 | <i>0610010B08Rik</i>      |
| ENSMUSG00000046844 | <i>AI427515</i>      | ENSMUSG00000078886 |                           |
| ENSMUSG00000047109 | <i>Cldn14</i>        | ENSMUSG00000078887 |                           |
| ENSMUSG00000047115 | <i>D330028D13Rik</i> | ENSMUSG00000078893 |                           |
| ENSMUSG00000047434 | <i>AI480653</i>      | ENSMUSG00000078903 |                           |

|                    |                      |                    |                 |
|--------------------|----------------------|--------------------|-----------------|
| ENSMUSG00000047643 |                      | ENSMUSG00000078979 |                 |
| ENSMUSG00000047767 | <i>Atg16l2</i>       | ENSMUSG00000079029 | <i>EG266459</i> |
| ENSMUSG00000048764 | <i>Tmprss11f</i>     | ENSMUSG00000079030 |                 |
| ENSMUSG00000049112 | <i>Oxtr</i>          | ENSMUSG00000079031 | <i>BB287469</i> |
| ENSMUSG00000049119 | <i>1700012H17Rik</i> | ENSMUSG00000079032 |                 |
| ENSMUSG00000049336 | <i>Odz2</i>          | ENSMUSG00000079298 | <i>Klrb1b</i>   |
| ENSMUSG00000049744 | <i>Arhgap15</i>      | ENSMUSG00000079509 | <i>Zfa</i>      |
| ENSMUSG00000050677 | <i>Ccdc96</i>        | ENSMUSG00000079658 | <i>Tceb1</i>    |
| ENSMUSG00000050947 | <i>Amigo1</i>        | ENSMUSG00000079808 |                 |
| ENSMUSG00000051037 | <i>Zfp455</i>        | ENSMUSG00000080893 |                 |
| ENSMUSG00000051341 | <i>Zfp52</i>         | ENSMUSG00000081204 |                 |
| ENSMUSG00000051451 | <i>Crebzf</i>        | ENSMUSG00000081614 |                 |
| ENSMUSG00000051747 | <i>Ttn</i>           | ENSMUSG00000081629 |                 |
| ENSMUSG00000052544 | <i>St6galnac3</i>    | ENSMUSG00000081656 |                 |
| ENSMUSG00000052738 | <i>Suclg1</i>        | ENSMUSG00000081937 |                 |
| ENSMUSG00000052962 | <i>Mrpl35</i>        | ENSMUSG00000081984 | <i>Dnajb3</i>   |
| ENSMUSG00000053475 | <i>Tnfaip6</i>       | ENSMUSG00000082280 |                 |
| ENSMUSG00000053626 | <i>Tll1</i>          | ENSMUSG00000083422 |                 |
| ENSMUSG00000053830 |                      | ENSMUSG00000083840 |                 |
| ENSMUSG00000054087 | <i>Fbxw14</i>        | ENSMUSG00000084317 |                 |
| ENSMUSG00000054477 | <i>Kcnn2</i>         |                    |                 |
| ENSMUSG00000054737 | <i>Zfp182</i>        |                    |                 |
| ENSMUSG00000055368 | <i>Slc6a2</i>        |                    |                 |
| ENSMUSG00000055692 | <i>Tmem191c</i>      |                    |                 |
| ENSMUSG00000056328 | <i>Myh1</i>          |                    |                 |
| ENSMUSG00000056498 | <i>Tmem154</i>       |                    |                 |
| ENSMUSG00000056537 | <i>Rnf12</i>         |                    |                 |
| ENSMUSG00000056973 | <i>Ces3</i>          |                    |                 |
| ENSMUSG00000057330 |                      |                    |                 |
| ENSMUSG00000057363 | <i>Uxs1</i>          |                    |                 |
| ENSMUSG00000057465 | <i>Saa2</i>          |                    |                 |

ENSMUSG00000057551 *Zfp317*  
ENSMUSG00000057894 *Zfp329*  
ENSMUSG00000057933 *Gsta2*  
ENSMUSG00000058172  
ENSMUSG00000058258 *Idi1*  
ENSMUSG00000058729 *Lin9*  
ENSMUSG00000058748 *BC003267*  
ENSMUSG00000059534 *1110020P15Rik*  
ENSMUSG00000060890 *Arr3*  
ENSMUSG00000061555  
ENSMUSG00000061576 *Dpp6*  
ENSMUSG00000061780 *Cfd*  
ENSMUSG00000062070 *Pgk1*  
ENSMUSG00000062705 *Tpbpb*  
ENSMUSG00000062861 *Zfp28*  
ENSMUSG00000063605 *Ccdc102a*  
ENSMUSG00000063661 *Krt73*  
ENSMUSG00000063779 *Chi3l4*  
ENSMUSG00000066151 *Fkbp15*  
ENSMUSG00000066677 *E430029J22Rik*  
ENSMUSG00000068105 *Tnfrsf13c*  
ENSMUSG00000068231 *V1ra5*  
ENSMUSG00000068882 *Ssb*  
ENSMUSG00000069094 *Pde7a*  
ENSMUSG00000069441 *Dsg1a*  
ENSMUSG00000069769 *Msi2*  
ENSMUSG00000069911 *EG574403*  
ENSMUSG00000071037 *1700106N22Rik*  
ENSMUSG00000071217 *BB287469*  
ENSMUSG00000071281 *Zfp71-rs1*  
ENSMUSG00000071356 *Reg3b*

ENSMUSG00000072595 *4930503E14Rik*  
ENSMUSG00000072704 *2700089E24Rik*  
ENSMUSG00000072905  
ENSMUSG00000072919 *4933437F05Rik*  
ENSMUSG00000073002 *Vamp5*  
ENSMUSG00000073005  
ENSMUSG00000073409 *H2-Q1*  
ENSMUSG00000073643 *Wdfy1*  
ENSMUSG00000073795 *6430531B16Rik*  
ENSMUSG00000073830  
ENSMUSG00000073832  
ENSMUSG00000073839 *OTTMUSG00000012493*  
ENSMUSG00000073842 *OTTMUSG00000007428*  
ENSMUSG00000073968 *Trim68*  
ENSMUSG00000074179  
ENSMUSG00000074181  
ENSMUSG00000074183 *Gsta1*  
ENSMUSG00000074499  
ENSMUSG00000074527  
ENSMUSG00000074598  
ENSMUSG00000074802 *Gas2l3*  
ENSMUSG00000074865 *6720457D02Rik*  
ENSMUSG00000074867 *EG630579*  
ENSMUSG00000075053  
ENSMUSG00000075316 *Scn9a*  
ENSMUSG00000075359  
ENSMUSG00000075595 *Zfp652*  
ENSMUSG00000078348 *Sf3b5*  
ENSMUSG00000078673  
ENSMUSG00000078680 *2610016E04Rik*  
ENSMUSG00000078683 *Mup1*

ENSMUSG00000078686 *Mup2*  
ENSMUSG00000078687 *OTTMUSG00000008509*  
ENSMUSG00000078688  
ENSMUSG00000078868 *OTTMUSG00000016580*  
ENSMUSG00000078894 *2210418O10Rik*  
ENSMUSG00000078979  
ENSMUSG00000079029 *EG266459*  
ENSMUSG00000079030  
ENSMUSG00000079031 *BB287469*  
ENSMUSG00000079032  
ENSMUSG00000079271  
ENSMUSG00000079284  
ENSMUSG00000079298 *Klr1b*  
ENSMUSG00000079349 *Magea5*  
ENSMUSG00000079421 *4930402F06Rik*  
ENSMUSG00000079620 *Muc4*  
ENSMUSG00000079658 *Tceb1*  
ENSMUSG00000082100  
ENSMUSG00000082361 *Btc*  
ENSMUSG00000083557  
ENSMUSG00000083854  
ENSMUSG00000084048

## Supplemental Table IIb: Confirmation of a subset of regulated array genes

Expression analysis of a subset of regulated genes from the Array study was performed with aortic tissue from individual congenic mice to confirm the data obtained in the microarray study.

RNA was isolated from 6 week old female mice (F1.*Apoe*<sup>-/-</sup>Chr10<sup>FVB/FVB</sup>, F1.*Apoe*<sup>-/-</sup>Chr10<sup>B6/FVB</sup> and F1.*Apoe*<sup>-/-</sup>Chr10<sup>B6/B6</sup>). Aortic tissue was homogenized and pipetted onto a Qiashredder prior to RNA isolation with the RNeasy fibrous tissue Kit (Qiagen). Contaminating DNA was removed (DNA-free, Ambion) and 1 µg RNA per sample was reverse transcribed using Superscript II (Invitrogen) and a 1:1 mixture of Oligo(dT) and Hexamer primers. The resulting cDNA pools provided templates for radioactive PCRs using specific primers at annealing temperatures ranging between 60°C and 65°C in the presence of dNTPs, [ $\alpha$ -<sup>32</sup>P]dCTP, and Taq DNA polymerase.

The table below shows three genes (*Adipoq*, *Snap25* and *Cfd*) that were found to be differentially regulated in aorta between F1.*Apoe*<sup>-/-</sup>Chr10<sup>B6/B6</sup> and F1.*Apoe*<sup>-/-</sup>Chr10<sup>FVB/FVB</sup> and between F1.*Apoe*<sup>-/-</sup>Chr10<sup>B6/FVB</sup> and F1.*Apoe*<sup>-/-</sup>Chr10<sup>FVB/FVB</sup> congenic mice. The last gene, *Acly*, was called not regulated in our microarray analysis for both comparisons. As shown in the table below all the genes that we considered regulated based on the microarray analysis, were also found to be regulated when their expression levels were determined by radioactive RT-PCR and the gene we considered unregulated was found to be equally expressed in aorta of congenic mice from all three genotypes.

These experiments indicate that our approach to use only genes that were regulated between F1.*Apoe*<sup>-/-</sup>Chr10<sup>B6/B6</sup> and F1.*Apoe*<sup>-/-</sup>Chr10<sup>FVB/FVB</sup> and between F1.*Apoe*<sup>-/-</sup>Chr10<sup>B6/FVB</sup> and F1.*Apoe*<sup>-/-</sup>Chr10<sup>FVB/FVB</sup> congenic mice resulted in a reliable list of differentially regulated genes.

| Description                                          | symbol        | qPCR       |            | Array                 |                       |
|------------------------------------------------------|---------------|------------|------------|-----------------------|-----------------------|
|                                                      |               | BB vs FF   | BF vs FF   | BB vs FF              | BF vs FF              |
| adiponectin, C1Q and collagen domain containing Gene | <i>Adipoq</i> | -4.3 ± 0.4 | -2 ± 0.1   | -2,7                  | -3,2                  |
| synaptosomal-associated protein 25                   | <i>Snap25</i> | -6.4 ± 0.5 | -2.2 ± 0.3 | -25.1                 | -3.6                  |
| Complement factor D                                  | <i>Cfd</i>    | -4 ± 0.4   | -2.3 ± 0.1 | -2.5                  | -2.5                  |
| ATP citrate lyase                                    | <i>Acly</i>   | -1.1 ± 0.2 | -1.1 ± 0.3 | not regulated >2 fold | not regulated >2 fold |

All qPCRs were done with six mice per genotype, errors are STDEV

**Supplemental Table IIc: Level 1 GO terms**

| GO Term    | Name of GO Term                           | BB vs FF | BF vs FF |
|------------|-------------------------------------------|----------|----------|
| GO:0009987 | cellular process                          | 160/354  | 148/253  |
| GO:0008152 | metabolic process                         | 107/354  | 108/253  |
| GO:0065007 | biological regulation                     | 103/354  | 90/253   |
| GO:0050789 | regulation of biological process          | 92/354   | 79/253   |
| GO:0032502 | developmental process                     | 79/354   | 60/253   |
| GO:0032501 | multicellular organismal process          | 74/354   | 49/253   |
| GO:0050896 | response to stimulus                      | 59/354   | 55/253   |
| GO:0051179 | localization                              | 44/354   | 35/253   |
| GO:0048518 | positive regulation of biological process | 41/354   | 34/253   |
| GO:0048519 | negative regulation of biological process | 32/354   | 29/253   |
| GO:0051234 | establishment of localization             | 30/354   | 30/253   |
| GO:0002376 | immune system process                     | 18/354   | 17/253   |
| GO:0040011 | locomotion                                | 16/354   | 6/253    |
| GO:0000003 | reproduction                              | 18/354   | 22/253   |
| GO:0022414 | reproductive process                      | 18/354   | 21/253   |
| GO:0051704 | multi-organism process                    | 11/354   | 11/253   |
| GO:0022610 | biological adhesion                       | 4/354    | 5/253    |
| GO:0040007 | growth                                    | 4/354    | 5/253    |
| GO:0048511 | rhythmic process                          | 5/354    | 5/253    |
| GO:0016032 | viral reproduction                        | 1/354    | 0/253    |
| GO:0043473 | pigmentation                              | 3/354    | 1/253    |
| GO:0001906 | cell killing                              | 3/354    | 1/253    |



**Supplemental Table IId: Specific GO terms**

| GO:0002376            |                | GO:0008219    |               | GO:0003018                             |                |
|-----------------------|----------------|---------------|---------------|----------------------------------------|----------------|
| immune system process |                | cell death    |               | vascular process in circulatory system |                |
| BB vs FF              | BF vs FF       | BB vs FF      | BF vs FF      | BB vs FF                               | BF vs FF       |
| <i>Runx1</i>          | <i>Runx1</i>   | <i>Cidec</i>  | <i>Cidec</i>  | <i>Dbh</i>                             | <i>Dbh</i>     |
| <i>Klrb1b</i>         | <i>Klrb1b</i>  | <i>Adipoq</i> | <i>Adipoq</i> | <i>Adora2b</i>                         | <i>Adora2b</i> |
| <i>Cfd</i>            | <i>Cfd</i>     | <i>Dbh</i>    | <i>Dbh</i>    |                                        | <i>Ptgs1</i>   |
| <i>Ido1</i>           | <i>Ido1</i>    | <i>Klrb1b</i> | <i>Klrb1b</i> |                                        | <i>Nos3</i>    |
| <i>Adipoq</i>         | <i>Adipoq</i>  | <i>Steap3</i> | <i>Steap3</i> |                                        |                |
| <i>Dbh</i>            | <i>Dbh</i>     | <i>Nsmaj</i>  | <i>Nsmaj</i>  |                                        |                |
| <i>Tiparp</i>         | <i>Tiparp</i>  | <i>opa1</i>   | <i>Fas</i>    |                                        |                |
| <i>Irak1</i>          | <i>Irak1</i>   | <i>Rtn4</i>   | <i>Frag1</i>  |                                        |                |
| <i>Adora2b</i>        | <i>Adora2b</i> | <i>Hmox1</i>  | <i>Sgms1</i>  |                                        |                |
| <i>Swap70</i>         | <i>Fas</i>     | <i>Nup62</i>  | <i>Cidea</i>  |                                        |                |
| <i>Tnfrsf13c</i>      | <i>Plscr1</i>  | <i>Il12b</i>  | <i>Xiap</i>   |                                        |                |
| <i>Nup85</i>          | <i>Cd36</i>    | <i>Pik3ca</i> | <i>Bak1</i>   |                                        |                |
| <i>Il12b</i>          | <i>Tgfbr2</i>  | <i>ppm1k</i>  | <i>AEN</i>    |                                        |                |
| <i>Hmox1</i>          | <i>Foxp1</i>   | <i>Muc4</i>   | <i>Dffb</i>   |                                        |                |
| <i>tll1</i>           | <i>Bak1</i>    | <i>Topors</i> | <i>Sycp3</i>  |                                        |                |
| <i>Muc4</i>           | <i>snx5</i>    | <i>Acvr1c</i> | <i>Vps25</i>  |                                        |                |
| <i>Six4</i>           | <i>Hbb-b1</i>  | <i>Btc</i>    | <i>Ptk2b</i>  |                                        |                |
| <i>Kitl</i>           |                | <i>Kitl</i>   |               |                                        |                |
|                       |                | <i>E2f1</i>   |               |                                        |                |
|                       |                | <i>Snai2</i>  |               |                                        |                |
|                       |                | <i>Nr4a2</i>  |               |                                        |                |
|                       |                | <i>Asns</i>   |               |                                        |                |
|                       |                | <i>Eef1a2</i> |               |                                        |                |

The genes highlighted in gray are regulated in BB vs. FF as well as BF vs. FF mice.

### Supplemental Table III:

Plasma total cholesterol and HDL-cholesterol of ApoE  $-/-$  mice on the BF (F1) background that were fed a 0.02 % cholesterol diet for 12 weeks starting at 4 weeks of age

| line | Interval Genotype | males      |                     |                   |    | females    |                     |                   |    |
|------|-------------------|------------|---------------------|-------------------|----|------------|---------------------|-------------------|----|
|      |                   | Weight (g) | Total Chol (mmol/L) | HDL-Chol (mmol/L) | N  | Weight (g) | Total Chol (mmol/L) | HDL-Chol (mmol/L) | N  |
| B    | B/F               | 33.8 ± 3.3 | 22.0 ± 7.7          | 0.67 ± 0.36       | 28 | 25.8 ± 3.0 | 16.6 ± 3.1          | 0.46 ± 0.20       | 31 |
|      | F/F               | 33.6 ± 3.0 | 20.9 ± 6.1          | 0.71 ± 0.34       | 20 | 25.6 ± 3.2 | 16.4 ± 3.0          | 0.42 ± 0.16       | 26 |
| C    | B/F               | 34.0 ± 3.1 | 20.1 ± 5.4          | 0.64 ± 0.12       | 36 | 24.6 ± 2.2 | 16.8 ± 3.2          | 0.42 ± 0.11       | 26 |
|      | F/F               | 34.2 ± 3.7 | 18.7 ± 4.9          | 0.7 ± 0.16        | 33 | 24.7 ± 2.3 | 15.2 ± 2.7          | 0.40 ± 0.10       | 25 |
| D    | B/F               | 33.6 ± 3.9 | 24.4 ± 5.6          | 0.53 ± 0.18       | 34 | 26.4 ± 2.7 | 16.5 ± 3.5          | 0.47 ± 0.31       | 30 |
|      | F/F               | 35.4 ± 3.8 | 23.4 ± 4.2          | 0.61 ± .021       | 45 | 26.0 ± 1.8 | 16.2 ± 2.2          | 0.48 ± 0.24       | 18 |
| E    | B/F               | 33.8 ± 5.8 | 22.5 ± 3.6          | 0.65 ± 0.17       | 9  | 27.1 ± 3.6 | 17.3 ± 2.1          | 0.40 ± 0.14       | 14 |
|      | F/F               | 35.1 ± 4.7 | 23.4 ± 3.5          | 0.66 ± 0.18       | 11 | 26.8 ± 1.9 | 17.1 ± 2.0          | 0.46 ± 0.17       | 12 |
| F    | B/F               | 33.9 ± 2.9 | 20.2 ± 5.4          | 0.63 ± 0.13       | 8  | 25.9 ± 3.3 | 15.3 ± 2.7          | 0.36 ± 0.10       | 10 |
|      | F/F               | 32.3 ± 6.2 | 19.0 ± 6.4          | 0.61 ± 0.13       | 10 | 25.6 ± 2.9 | 16.0 ± 2.6          | 0.36 ± 0.10       | 20 |
| G    | B/F               | 31.9 ± 3.7 | 22.9 ± 4.1          | 0.72 ± 0.67       | 30 | 24.9 ± 3.0 | 17.1 ± 5.7          | 0.38 ± 0.12       | 19 |
|      | F/F               | 32.6 ± 3.7 | 20.0 ± 4.8          | 0.93 ± 1.04       | 29 | 24.9 ± 2.3 | 15.7 ± 5.0          | 0.51 ± 0.38       | 20 |
| H    | B/F               | 34.4 ± 4.8 | 22.2 ± 4.9          | 0.66 ± 0.16       | 18 | 24.7 ± 2.0 | 18.1 ± 2.8          | 0.37 ± 0.11       | 24 |
|      | F/F               | 33.8 ± 5.1 | 22.0 ± 4.4          | 0.65 ± 0.17       | 39 | 25.6 ± 3.0 | 17.2 ± 2.7          | 0.35 ± 0.08       | 24 |
| I    | B/F               | 32.3 ± 4.6 | 23.0 ± 4.5          | 0.59 ± 0.12       | 24 | 24.2 ± 2.8 | 18.6 ± 4.4          | 0.36 ± 0.09       | 30 |
|      | F/F               | 32.2 ± 4.7 | 23.1 ± 5.4          | 0.63 ± 0.15       | 36 | 24.0 ± 2.3 | 18.9 ± 3.6          | 0.39 ± 0.07       | 27 |
| L    | B/F               | 37.1 ± 4.8 | 26.7 ± 5.0          | 0.82 ± 0.31       | 26 | 28.7 ± 2.5 | 18.1 ± 1.7          | 0.47 ± 0.23       | 21 |
|      | F/F               | 38.2 ± 4.1 | 27.4 ± 5.7          | 0.71 ± 0.22       | 23 | 28.7 ± 2.4 | 19.3 ± 3.2          | 0.46 ± 0.19       | 12 |
| M    | B/F               | 33.9 ± 6.4 | 27.6 ± 4.6          | 0.61 ± 0.19       | 13 | 25.7 ± 2.9 | 17.1 ± 2.7          | 0.40 ± 0.18       | 19 |
|      | F/F               | 33.2 ± 5.4 | 27.0 ± 4.8          | 0.52 ± 0.23       | 15 | 26.0 ± 3.1 | 18.7 ± 2.8          | 0.33 ± 0.08       | 10 |
| R    | B/F               | 30.0 ± 3.8 | 24.9 ± 5.7          | 0.45 ± 0.12       | 18 | 23.6 ± 2.3 | 17.9 ± 1.4          | 0.30 ± 0.16       | 10 |
|      | F/F               | 31.0 ± 3.7 | 26.6 ± 5.7          | 0.52 ± 0.24       | 16 | 24.9 ± 1.7 | 17.1 ± 2.6          | 0.27 ± 0.18       | 8  |

chol.: cholesterol

**Supplemental Table IVa: Potential coding Polymorphisms in Chr10a region genes**

| <b>Gene</b>          | <b>Identifier</b> | <b>bp on Chr.10</b> | <b>C57 allele</b> | <b>FVB allele</b> | <b>Position in gene</b> |                   |
|----------------------|-------------------|---------------------|-------------------|-------------------|-------------------------|-------------------|
| <i>Oprm1</i>         | rs8256409         | 3557671             | CC                | NA                | NON-synonymous coding   |                   |
|                      | rs8256410         | 3557714             | TT                | NA                | NON-synonymous coding   |                   |
|                      | rs8256412         | 3557735             | GG                | AA                | NON-synonymous coding   |                   |
|                      | rs8256413         | 3557747             | CC                | NA                | NON-synonymous coding   |                   |
|                      | rs8256414         | 3557753             | CC                | NA                | NON-synonymous coding   |                   |
| <i>Myct1</i>         | rs13463552        | 4742021             | GG                | AA                | NON-synonymous coding   |                   |
| <i>Syne1</i>         | rs29333838        | 4941115             | GG                | AA                | NON-synonymous coding   |                   |
|                      | rs46286204        | 4985703             | GG                | NA                | NON-synonymous coding   |                   |
|                      | rs50920570        | 4985856             | CC                | NA                | NON-synonymous coding   |                   |
|                      | rs29381593        | 5003061             | GG                | CC                | NON-synonymous coding   |                   |
|                      | rs29322194        | 5007247             | GG                | NA                | NON-synonymous coding   |                   |
|                      | rs29366127        | 5019159             | TT                | NA                | NON-synonymous coding   |                   |
|                      | rs47509626        | 5022442             | CC                | AA                | NON-synonymous coding   |                   |
|                      | rs6154748         | 5034787             | TT                | NA                | NON-synonymous coding   |                   |
|                      | rs29315406        | 5037302             | CC                | TT                | NON-synonymous coding   |                   |
|                      | rs50612810        | 5100601             | AA                | NA                | NON-synonymous coding   |                   |
|                      | rs48321799        | 5141253             | CC                | NA                | NON-synonymous coding   |                   |
|                      | rs45700937        | 5274496             | GG                | NA                | NON-synonymous coding   |                   |
|                      | <i>Esr1</i>       | rs47715549          | 5377292           | TT                | NA                      | synonymous coding |
|                      |                   | rs16821161          | 5377331           | CC                | AA                      | synonymous coding |
| <i>9230019H11Rik</i> | rs50658327        | 7221350             | GG                | NA                | NON-synonymous coding   |                   |
|                      | rs48707627        | 7221488             | CC                | GG                | NON-synonymous coding   |                   |
|                      | rs47392805        | 7221512             | CC                | TT                | NON-synonymous coding   |                   |
|                      | rs29358647        | 7226312             | TT                | NA                | NON-synonymous coding   |                   |
|                      | rs29378454        | 7226334             | TT                | NA                | NON-synonymous coding   |                   |

NA- Not Available

**Supplemental Table IVb: Potential Polymorphisms in Chr10b region genes**

| <b>Gene</b>          | <b>Identifier</b>    | <b>bp on Chr.10</b> | <b>C57 allele</b> | <b>FVB allele</b> | <b>Position in gene</b> |
|----------------------|----------------------|---------------------|-------------------|-------------------|-------------------------|
| <i>Ahi-1</i>         | rs29352531           | 20699420            | AA                | TT                | intronic splice site    |
|                      | rs29352059           | 20706839            | GG                | AA                | synonymus coding        |
|                      | rs51094258           | 20792354            | GG                | NA                | synonymus coding        |
| <i>Myb</i>           | rs4228164            | 20844928            | TT                | NA                | 3-prime UTR             |
|                      | rs4228163            | 20845052            | AA                | NA                | 3-prime UTR             |
|                      | rs4228162            | 20845056            | TT                | CC                | 3-prime UTR             |
|                      | rs33850059           | 20861616            | CC                | AA                | synonymus coding        |
|                      | rs29363766           | 20861641            | TT                | CC                | NON-synonymus coding    |
| <i>Hbs1l</i>         | rs13471458           | 21061554            | GG                | NA                | NON-synonymus coding    |
|                      | rs13471460           | 21064904            | AA                | NA                | synonymus coding        |
|                      | rs13471461           | 21088108            | GG                | NA                | 3-prime UTR             |
|                      | rs13471457           | 21088455            | AA                | NA                | 3-prime UTR             |
|                      | rs29336840           | 21088605            | GG                | AA                | 3-prime UTR             |
| <i>Aldh8a1</i>       | rs29343840           | 21111381            | TT                | CC                | synonymus coding        |
|                      | rs48185419           | 21115775            | TT                | CC                | 3-prime UTR             |
| <i>Sgk1</i>          | rs13459455           | 21716415            | AA                | CC                | synonymus coding        |
|                      | rs13459456           | 21717174            | GG                | AA                | synonymus coding        |
|                      | rs50242814           | 21719052            | CC                | NA                | 3-prime UTR             |
|                      | rs13459457           | 21719235            | AA                | NA                | 3-prime UTR             |
| <i>Raet1e</i>        | rs46705643           | 21878325            | CC                | TT                | up-stream               |
|                      | ENSMUSSNP<br>2562820 | 21878341            | GG                | NA                | up-stream               |
|                      | ENSMUSSNP<br>6464985 | 21878344            | GG                | NA                | up-stream               |
|                      | ENSMUSSNP<br>3234255 | 21878353            | CC                | NA                | up-stream               |
|                      | rs50817078           | 21878391            | TT                | CC                | 5-prime UTR             |
|                      | ENSMUSSNP<br>3518224 | 21878427            | CC                | NA                | 5-prime UTR             |
|                      | rs49521453           | 21878457            | CC                | GG                | 5-prime UTR             |
|                      | ENSMUSSNP<br>648610  | 21891803            | GG                | NA                | intronic splice site    |
| ENSMUSSNP<br>3894657 | 21891843             | GG                  | NA                | 5-prime UTR       |                         |

NA- Not Available
